# Supplementary material for: Multidrug-resistant E. coli encoding high genetic diversity in carbohydrate metabolism genes displace commensal E. coli from the intestinal tract
Source: PubMed Central journal article supplement (PMC10581457; doi:10.1371/journal.pbio.3002329), 2023-10-17

**A**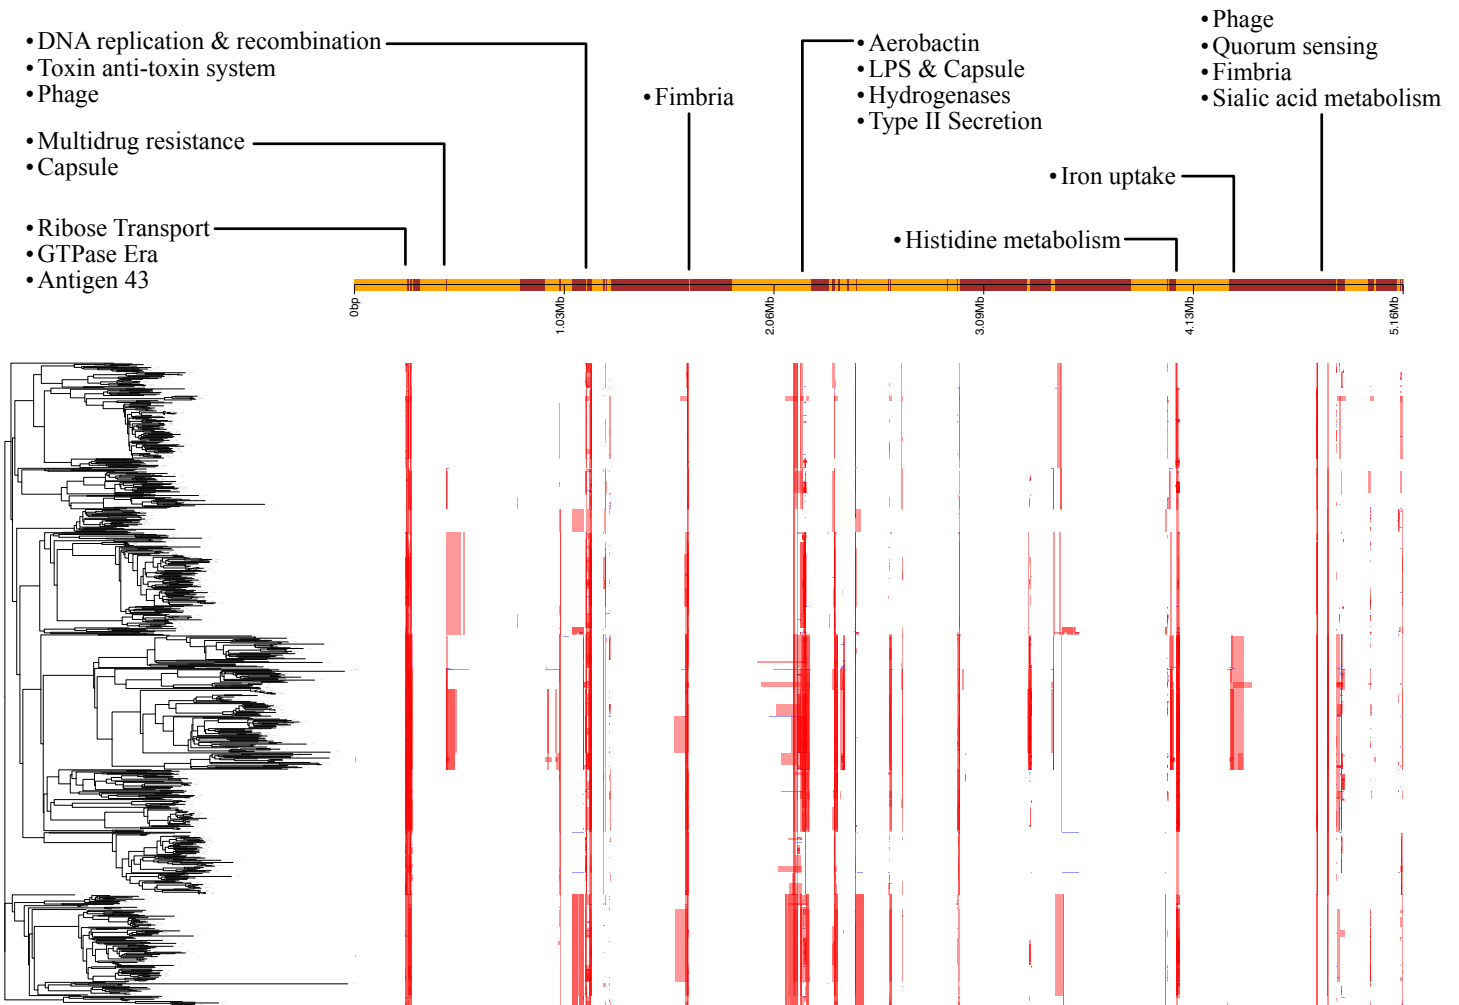**B**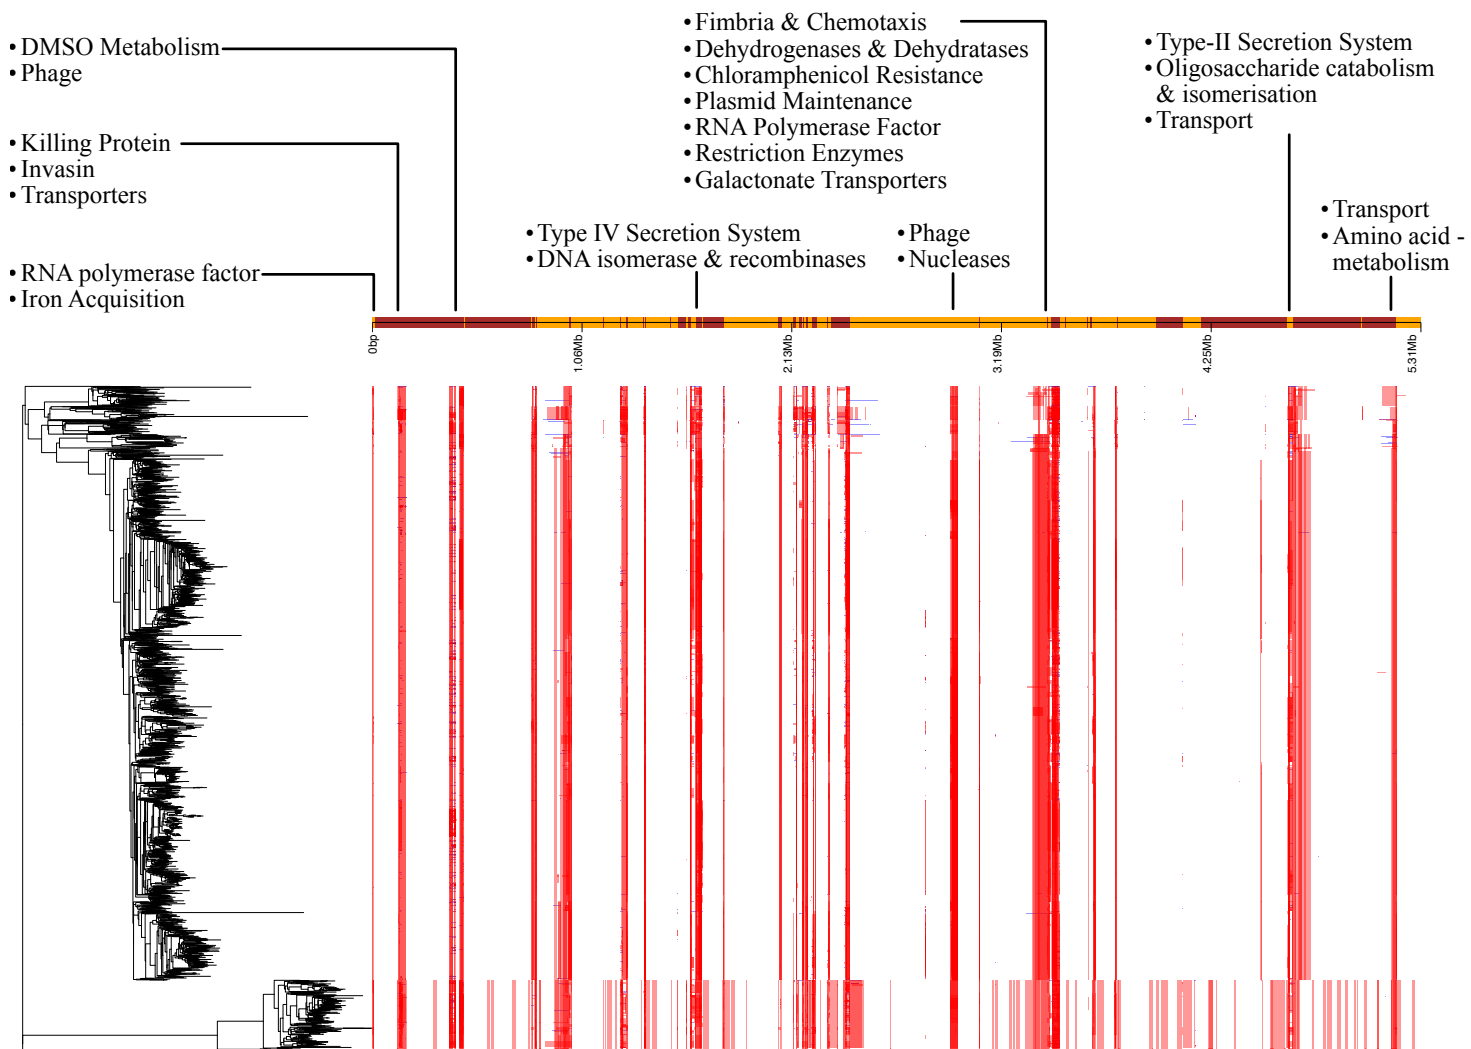

Supplement: pbio.3002329.s023.pdf [file pbio.3002329.s023.pdf]
