# Supplementary material for: Multidrug-resistant E. coli encoding high genetic diversity in carbohydrate metabolism genes displace commensal E. coli from the intestinal tract
Source: PLoS Biol. 2023 Oct 17;21(10):e3002329. doi: 10.1371/journal.pbio.3002329 (PMC10581457; doi:10.1371/journal.pbio.3002329)
Supplement: S5 Data — Data used to produce Fig 4A. (XLSX) [file pbio.3002329.s028.xlsx]

## Sheet: Sheet1
Plate Type	Strain Number	Experiment	JTMAM1	JTMAM2	JTMAM2	JTMAM2		Following:	https://www.statology.org/one-way-anova-by-hand/												Plate Type	Strain Number	Experiment	JTMAM1	JTMAM2	JTMAM2	JTMAM2													Plate Type	Strain Number	Experiment	JTMAM1	JTMAM2	JTMAM2	JTMAM2
PM 1-	F084	Replicate	1	2	3	4															PM 1-	F016	Replicate	1	2	3	4													PM 1-	811F7	Replicate	1	2	3	4
		Hour	9	24	24	24	Mean	Overall mean	SSR		SSE	SST	df treatment	df error	df total	ms treatment	ms error	F	F critical	Hypothesis			Hour	9	24	24	24	Mean		df treatment	df error	df total	ms treatment	ms error	F	F critical						Hour	9	24	24	24	Mean		df treatment
FALSE		A1_Negative_Control	46	58	65	55	56	56.6667	34.6667	187.778	576.667	611.333	3	8	11	203.778	72.0833	2.82697	4.0662	Null			A1_Negative_Control	51	59	47	63	55	171.111	3	8	11	57.037	6.875	8.2963	4.0662	significant					A1_Negative_Control	52	54	70	60	59	217.778	3
FALSE		A2_L-Arabinose	212	214	218	205	212.25	154.917	25340.7	13237.2	26136.9	51477.6	3	8	11	17159.2	3267.11	5.25209	4.0662	significant			A2_L-Arabinose	89	112	87	111	99.75	12728.2	3	8	11	4242.73	12.4688	340.269	4.0662	significant					A2_L-Arabinose	147	149	163	152	152.75	171.528	3
TRUE		A3_N-Acetyl-D_Glucosamine	184	165	174	156	169.75	145.917	22032.7	2704.86	22942.9	44975.6	3	8	11	14991.9	2867.86	5.22753	4.0662	significant			A3_N-Acetyl-D_Glucosamine	83	89	82	89	85.75	14522.9	3	8	11	4840.95	10.7188	451.634	4.0662	significant					A3_N-Acetyl-D_Glucosamine	174	173	183	199	182.25	5715.19	3
FALSE		A4_D-Saccharic_Acid	297	302	289	298	296.5	292.583	263.167	150.361	1066.92	1330.08	3	8	11	443.361	133.365	3.32443	4.0662	Null			A4_D-Saccharic_Acid	270	286	304	284	286	757.361	3	8	11	252.454	35.75	7.06164	4.0662	significant					A4_D-Saccharic_Acid	294	295	288	304	295.25	159.194	3
FALSE		A5_Succinic_Acid	296	300	296	292	296	288.833	672.667	237.444	965.667	1638.33	3	8	11	546.111	120.708	4.52422	4.0662	significant			A5_Succinic_Acid	284	293	304	287	292	274.111	3	8	11	91.3704	36.5	2.5033	4.0662	Null					A5_Succinic_Acid	276	276	280	282	278.5	454.111	3
FALSE		A6_D-Galactose	270	262	256	258	261.5	270.25	514.5	421.25	704.25	1218.75	3	8	11	406.25	88.0312	4.61484	4.0662	significant			A6_D-Galactose	277	272	283	277	277.25	256.75	3	8	11	85.5833	34.6562	2.46949	4.0662	Null					A6_D-Galactose	270	271	272	275	272	26.25	3
FALSE		A7_L-Aspartic_Acid	280	280	278	282	280	281.083	52.1667	12.6944	460.917	513.083	3	8	11	171.028	57.6146	2.96848	4.0662	Null			A7_L-Aspartic_Acid	273	284	299	280	284	396.028	3	8	11	132.009	35.5	3.71857	4.0662	Null					A7_L-Aspartic_Acid	284	277	276	280	279.25	52.1944	3
TRUE		A8_L-Proline	83	73	94	85	83.75	199.167	79971.2	53506.8	80341.7	160313	3	8	11	53437.6	10042.7	5.32104	4.0662	significant			A8_L-Proline	266	258	255	258	259.25	14506.8	3	8	11	4835.59	32.4062	149.218	4.0662	significant					A8_L-Proline	259	250	259	250	254.5	12328.1	3
TRUE		A9_D-Alanine	51	63	66	62	60.5	183	90087.5	60154	90312	180400	3	8	11	60133.2	11289	5.3267	4.0662	significant			A9_D-Alanine	241	252	247	247	246.75	16317	3	8	11	5439	30.8438	176.34	4.0662	significant					A9_D-Alanine	243	237	245	242	241.75	13841	3
TRUE		A10_D-Trehalose	208	202	217	206	208.25	186.917	8891.17	1941.19	9384.92	18276.1	3	8	11	6092.03	1173.11	5.19304	4.0662	significant			A10_D-Trehalose	143	145	152	154	148.5	5988.36	3	8	11	1996.12	18.5625	107.535	4.0662	significant					A10_D-Trehalose	204	192	216	204	204	1455.36	3
TRUE		A11_D-Mannose	231	225	225	225	226.5	213.75	16200.5	677.25	16396.2	32596.8	3	8	11	10865.6	2049.53	5.3015	4.0662	significant			A11_D-Mannose	164	157	166	168	163.75	10068.8	3	8	11	3356.25	20.4688	163.969	4.0662	significant					A11_D-Mannose	250	244	258	252	251	5650.25	3
FALSE		A12_Dulcitol	38	39	48	41	41.5	43.4167	23.1667	75.6944	258.917	282.083	3	8	11	94.0278	32.3646	2.90527	4.0662	Null			A12_Dulcitol	48	45	34	49	44	143.361	3	8	11	47.787	5.5	8.68855	4.0662	significant					A12_Dulcitol	47	41	48	43	44.75	39.8611	3
TRUE		B1_D-Serine	146	218	212	239	203.75	255.833	16312.2	15699.4	21413.7	37725.8	3	8	11	12575.3	2676.71	4.69804	4.0662	significant			B1_D-Serine	273	279	290	277	279.75	2446.78	3	8	11	815.593	34.9688	23.3235	4.0662	significant					B1_D-Serine	285	286	276	289	284	3267.44	3
FALSE		B2_D-Sorbitol	271	264	254	259	262	248.75	2706.5	860.25	3118.25	5824.75	3	8	11	1941.58	389.781	4.98121	4.0662	significant			B2_D-Sorbitol	235	225	232	219	227.75	1918.75	3	8	11	639.583	28.4688	22.4662	4.0662	significant					B2_D-Sorbitol	263	257	249	257	256.5	339.25	3
FALSE		B3_Glycerol	285	270	260	278	273.25	261.833	887.167	868.111	1737.67	2624.83	3	8	11	874.944	217.208	4.02813	4.0662	Null			B3_Glycerol	254	249	255	252	252.5	369.444	3	8	11	123.148	31.5625	3.90172	4.0662	Null					B3_Glycerol	271	257	243	268	259.75	500.111	3
TRUE		B4_L-Fucose	255	241	240	255	247.75	206.417	12842.7	7044.53	14092.9	26935.6	3	8	11	8978.53	1761.61	5.09676	4.0662	significant			B4_L-Fucose	187	156	167	161	167.75	6535.19	3	8	11	2178.4	20.9688	103.888	4.0662	significant					B4_L-Fucose	222	193	202	198	203.75	513.194	3
FALSE		B5_D-Glucuronic_Acid	313	304	303	310	307.5	302.583	211.167	165.694	544.917	756.083	3	8	11	252.028	68.1146	3.70006	4.0662	Null			B5_D-Glucuronic_Acid	292	303	298	296	297.25	176.528	3	8	11	58.8426	37.1562	1.58365	4.0662	Null					B5_D-Glucuronic_Acid	313	304	293	302	303	202.694	3
FALSE		B6_D-Gluconic_Acid	307	302	300	304	303.25	299.917	179.167	71.1944	394.917	574.083	3	8	11	191.361	49.3646	3.87649	4.0662	Null			B6_D-Gluconic_Acid	291	302	288	297	294.5	234.361	3	8	11	78.1204	36.8125	2.12212	4.0662	Null					B6_D-Gluconic_Acid	308	302	296	302	302	89.3611	3
FALSE		B7_D-L-a-Glycerol_Phosphate	277	260	254	264	263.75	258.917	140.667	378.194	626.917	767.583	3	8	11	255.861	78.3646	3.26501	4.0662	Null			B7_D-L-a-Glycerol_Phosphate	258	258	260	251	256.75	65.5278	3	8	11	21.8426	32.0938	0.680587	4.0662	Null					B7_D-L-a-Glycerol_Phosphate	267	253	253	252	256.25	183.194	3
TRUE		B8_D-Xylose	262	251	250	264	256.75	222.5	22438.5	4851	24403	46841.5	3	8	11	15613.8	3050.38	5.11866	4.0662	significant			B8_D-Xylose	194	145	151	156	161.5	16353	3	8	11	5451	20.1875	270.019	4.0662	significant					B8_D-Xylose	265	243	243	246	249.25	3199	3
FALSE		B9_L-Lactic_Acid	270	272	261	274	269.25	264	171.5	209	512	683.5	3	8	11	227.833	64	3.5599	4.0662	Null			B9_L-Lactic_Acid	250	264	268	260	260.5	228	3	8	11	76	32.5625	2.33397	4.0662	Null					B9_L-Lactic_Acid	269	261	259	260	262.25	75	3
FALSE		B10_Formic_Acid	29	31	37	29	31.5	34.5833	162.167	81.0278	594.917	757.083	3	8	11	252.361	74.3646	3.39357	4.0662	Null			B10_Formic_Acid	36	33	27	34	32.5	62.3611	3	8	11	20.787	4.0625	5.11681	4.0662	significant					B10_Formic_Acid	55	30	38	36	39.75	451.528	3
TRUE		B11_D-Mannitol	210	214	205	215	211	193.5	4650	1287	5243	9893	3	8	11	3297.67	655.375	5.03172	4.0662	significant			B11_D-Mannitol	183	152	165	164	166	3515	3	8	11	1171.67	20.75	56.4659	4.0662	significant					B11_D-Mannitol	208	204	199	203	203.5	441	3
TRUE		B12_L-Glutamic_Acid	70	70	85	91	79	131.917	21652.2	11542.7	23208.9	44861.1	3	8	11	14953.7	2901.11	5.15447	4.0662	significant			B12_L-Glutamic_Acid	131	145	108	151	133.75	1108.19	3	8	11	369.398	16.7188	22.0948	4.0662	significant					B12_L-Glutamic_Acid	189	175	187	181	183	10558	3
FALSE		C1_D-Glucose-6-Phosphate	296	296	284	290	291.5	288.333	144.667	139.111	454.667	599.333	3	8	11	199.778	56.8333	3.51515	4.0662	Null			C1_D-Glucose-6-Phosphate	279	281	289	285	283.5	152.444	3	8	11	50.8148	35.4375	1.43393	4.0662	Null					C1_D-Glucose-6-Phosphate	296	282	286	296	290	163.111	3
TRUE		C2_D-GalactonicAcid-g-Lactone	272	256	248	265	260.25	237	4896.5	2491	6144	11040.5	3	8	11	3680.17	768	4.79188	4.0662	significant			C2_D-GalactonicAcid-g-Lactone	215	208	215	206	211	2770	3	8	11	923.333	26.375	35.0079	4.0662	significant					C2_D-GalactonicAcid-g-Lactone	264	236	225	234	239.75	883	3
FALSE		C3_D-L-Malic_Acid	286	283	268	281	279.5	275.833	81.1667	242.778	1319.67	1400.83	3	8	11	466.944	164.958	2.83068	4.0662	Null			C3_D-L-Malic_Acid	253	279	292	273	274.25	800.778	3	8	11	266.926	34.2812	7.78635	4.0662	significant					C3_D-L-Malic_Acid	282	269	263	281	273.75	276.111	3
FALSE		C4_D-Ribose	283	277	269	279	277	259.333	3385.17	1352.44	3620.67	7005.83	3	8	11	2335.28	452.583	5.15988	4.0662	significant			C4_D-Ribose	233	241	236	237	236.75	2072.78	3	8	11	690.926	29.5938	23.347	4.0662	significant					C4_D-Ribose	272	261	259	265	264.25	195.444	3
FALSE		C5_Tween_20	166	182	198	180	181.5	177.75	3010.5	571.25	9590.25	12600.8	3	8	11	4200.25	1198.78	3.50377	4.0662	Null			C5_Tween_20	107	189	195	136	156.75	7172.75	3	8	11	2390.92	19.5938	122.024	4.0662	significant					C5_Tween_20	193	177	197	213	195	1846.25	3
TRUE		C6_L-Rhamnose	252	239	212	249	238	211.417	4565.17	3820.69	6410.92	10976.1	3	8	11	3658.69	801.365	4.56558	4.0662	significant			C6_L-Rhamnose	205	183	191	188	191.75	1813.86	3	8	11	604.62	23.9688	25.2254	4.0662	significant					C6_L-Rhamnose	225	201	194	198	204.5	776.361	3
TRUE		C7_D-Fructose	232	242	238	249	240.25	209.417	13768.7	3955.53	14022.9	27791.6	3	8	11	9263.86	1752.86	5.28498	4.0662	significant			C7_D-Fructose	169	162	160	158	162.25	8967.53	3	8	11	2989.18	20.2812	147.386	4.0662	significant					C7_D-Fructose	228	224	222	229	225.75	1099.86	3
FALSE		C8_Acetic_Acid	231	237	250	260	244.5	234	1206	950	1968	3174	3	8	11	1058	246	4.30081	4.0662	significant			C8_Acetic_Acid	227	239	245	237	237	204	3	8	11	68	29.625	2.29536	4.0662	Null					C8_Acetic_Acid	215	217	226	224	220.5	814	3
TRUE		C9_a-D-Glucose	186	203	195	207	197.75	174.583	3270.17	2405.53	4012.92	7283.08	3	8	11	2427.69	501.615	4.83976	4.0662	significant			C9_a-D-Glucose	147	174	167	154	160.5	1242.36	3	8	11	414.12	20.0625	20.6415	4.0662	significant					C9_a-D-Glucose	166	162	164	170	165.5	365.028	3
TRUE		C10_Maltose	239	245	231	248	240.75	219	7888.5	2061	8526	16414.5	3	8	11	5471.5	1065.75	5.13394	4.0662	significant			C10_Maltose	196	181	181	174	183	5442	3	8	11	1814	22.875	79.3005	4.0662	significant					C10_Maltose	242	233	222	236	233.25	1023	3
TRUE		C11_D-Melibiose	261	264	243	262	257.5	186.583	133915	20401.7	134427	268342	3	8	11	89447.4	16803.4	5.32318	4.0662	significant			C11_D-Melibiose	35	37	36	41	37.25	89222.5	3	8	11	29740.8	4.65625	6387.3	4.0662	significant					C11_D-Melibiose	271	270	253	266	265	24802.7	3
FALSE		C12_Thymidine	287	285	286	286	286	287.083	35.1667	6.69444	70.9167	106.083	3	8	11	35.3611	8.86458	3.98903	4.0662	Null			C12_Thymidine	286	286	287	284	285.75	11.8611	3	8	11	3.9537	35.7188	0.11069	4.0662	Null					C12_Thymidine	290	285	292	291	289.5	52.3611	3
FALSE		D-1_L-Asparagine	251	276	269	272	267	259.083	2722.17	616.694	9180.92	11903.1	3	8	11	3967.69	1147.61	3.45734	4.0662	Null			D-1_L-Asparagine	171	260	264	257	238	7788.03	3	8	11	2596.01	29.75	87.2608	4.0662	significant					D-1_L-Asparagine	280	269	269	271	272.25	776.194	3
TRUE		D2_D-Aspartic_Acid	37	35	33	41	36.5	36	99.5	36	182	281.5	3	8	11	93.8333	22.75	4.12454	4.0662	significant			D2_D-Aspartic_Acid	34	32	29	34	32.25	73	3	8	11	24.3333	4.03125	6.03618	4.0662	significant					D2_D-Aspartic_Acid	44	38	37	38	39.25	73	3
FALSE		D3_D-Glucosaminic_Acid	49	41	43	60	48.25	46.8333	508.167	226.778	2009.67	2517.83	3	8	11	839.278	251.208	3.34096	4.0662	Null			D3_D-Glucosaminic_Acid	44	36	33	40	38.25	363.444	3	8	11	121.148	4.78125	25.3382	4.0662	significant					D3_D-Glucosaminic_Acid	83	52	39	42	54	1419.44	3
FALSE		D4_1-2-Propanediol	53	71	86	87	74.25	64.5833	1573.17	1136.53	3784.92	5358.08	3	8	11	1786.03	473.115	3.77504	4.0662	Null			D4_1-2-Propanediol	46	49	49	50	48.5	1043.69	3	8	11	347.898	6.0625	57.3853	4.0662	significant					D4_1-2-Propanediol	99	75	47	63	71	1604.69	3
FALSE		D5_Tween_40	91	95	84	99	92.25	77.8333	4097.17	954.111	9757.67	13854.8	3	8	11	4618.28	1219.71	3.78638	4.0662	Null			D5_Tween_40	55	46	54	52	51.75	2770.11	3	8	11	923.37	6.46875	142.743	4.0662	significant					D5_Tween_40	152	76	55	75	89.5	6033.44	3
TRUE		D6_a-Keto-Glutaric_Acid	81	48	46	82	64.25	90.75	29301.5	4001.75	32638.2	61939.8	3	8	11	20646.6	4079.78	5.06071	4.0662	significant			D6_a-Keto-Glutaric_Acid	61	44	44	43	48	7536.25	3	8	11	2512.08	6	418.681	4.0662	significant					D6_a-Keto-Glutaric_Acid	170	167	123	180	160	21100.2	3
TRUE		D7_a-Keto-Butyric_Acid	127	80	84	97	97	111.083	5468.17	2151.36	9100.92	14569.1	3	8	11	4856.36	1137.61	4.2689	4.0662	significant			D7_a-Keto-Butyric_Acid	161	135	144	125	141.25	4340.86	3	8	11	1446.95	17.6562	81.9514	4.0662	significant					D7_a-Keto-Butyric_Acid	129	80	88	83	95	2608.69	3
TRUE		D8_a-Methyl-D_Galactoside	272	273	273	274	273	254.667	9954.67	1346.44	10028.7	19983.3	3	8	11	6661.11	1253.58	5.31366	4.0662	significant			D8_a-Methyl-D_Galactoside	208	215	219	214	214	6677.11	3	8	11	2225.7	26.75	83.2039	4.0662	significant					D8_a-Methyl-D_Galactoside	279	275	278	276	277	2005.11	3
TRUE		D9_a-D-Lactose	249	252	245	254	250	168.083	95873.2	26887.4	96028.9	191902	3	8	11	63967.4	12003.6	5.32901	4.0662	significant			D9_a-D-Lactose	46	40	44	45	43.75	61855.9	3	8	11	20618.6	5.46875	3770.26	4.0662	significant					D9_a-D-Lactose	215	208	204	215	210.5	7285.69	3
TRUE		D10_Lactulose	231	238	212	230	227.75	166.25	87854	15497.8	89020.2	176874	3	8	11	58958.1	11127.5	5.2984	4.0662	significant			D10_Lactulose	56	44	35	46	45.25	58786.8	3	8	11	19595.6	5.65625	3464.41	4.0662	significant					D10_Lactulose	211	227	221	244	225.75	14735.8	3
TRUE		D11_Sucrose	39	42	42	38	40.25	78.6667	32508.2	5916.11	34356.7	66864.8	3	8	11	22288.3	4294.58	5.18986	4.0662	significant			D11_Sucrose	185	140	155	129	152.25	23428.8	3	8	11	7809.59	19.0312	410.356	4.0662	significant					D11_Sucrose	43	42	39	50	43.5	5011.78	3
FALSE		D12_Uridine	286	281	281	282	282.5	280.917	30.1667	27.0278	82.9167	113.083	3	8	11	37.6944	10.3646	3.63685	4.0662	Null			D12_Uridine	280	277	278	280	278.75	25.5278	3	8	11	8.50926	34.8438	0.244212	4.0662	Null					D12_Uridine	283	277	284	282	281.5	30.3611	3
TRUE		E1_L-Glutamine	108	119	133	126	121.5	140.25	17160.5	1747.25	18116.2	35276.8	3	8	11	11758.9	2264.53	5.19265	4.0662	significant			E1_L-Glutamine	184	206	188	194	193	11406.2	3	8	11	3802.08	24.125	157.599	4.0662	significant					E1_L-Glutamine	107	113	91	114	106.25	4962.75	3
FALSE		E2_m-Tartaric_Acid	33	33	26	29	30.25	28.9167	71.1667	41.8611	178.917	250.083	3	8	11	83.3611	22.3646	3.72737	4.0662	Null			E2_m-Tartaric_Acid	36	32	28	28	31	61.3611	3	8	11	20.4537	3.875	5.27838	4.0662	significant					E2_m-Tartaric_Acid	30	25	24	23	25.5	75.6944	3
FALSE		E3_D-Glucose-1-Phosphate	287	294	292	289	290.5	290.083	4.16667	29.6944	96.9167	101.083	3	8	11	33.6944	12.1146	2.78131	4.0662	Null			E3_D-Glucose-1-Phosphate	286	293	292	286	289.25	45.5278	3	8	11	15.1759	36.1562	0.419732	4.0662	Null					E3_D-Glucose-1-Phosphate	294	288	291	289	290.5	21.6944	3
FALSE		E4_D-Fructose-6-Phosphate	302	301	306	305	303.5	292.667	764.667	486.444	1054.67	1819.33	3	8	11	606.444	131.833	4.60008	4.0662	significant			E4_D-Fructose-6-Phosphate	277	287	294	280	284.5	439.778	3	8	11	146.593	35.5625	4.12211	4.0662	significant					E4_D-Fructose-6-Phosphate	297	283	291	289	290	128.444	3
FALSE		E5_Tween_80	70	63	59	56	62	58.5	171.5	159	699	870.5	3	8	11	290.167	87.375	3.32093	4.0662	Null			E5_Tween_80	59	50	54	50	53.25	165	3	8	11	55	6.65625	8.26291	4.0662	significant					E5_Tween_80	73	55	65	48	60.25	375	3
FALSE		E6_a-Hydroxy_Glutaric_Acid-g_Lactone	46	54	55	53	52	50.25	33.5	62.25	312.25	345.75	3	8	11	115.25	39.0312	2.95276	4.0662	Null			E6_a-Hydroxy_Glutaric_Acid-g_Lactone	55	46	40	51	48	146.25	3	8	11	48.75	6	8.125	4.0662	significant					E6_a-Hydroxy_Glutaric_Acid-g_Lactone	58	52	44	49	50.75	103.75	3
TRUE		E7_a-Hydroxy_Butyric_Acid	140	113	108	135	124	138.75	10485.5	1624.25	13400.2	23885.8	3	8	11	7961.92	1675.03	4.75329	4.0662	significant			E7_a-Hydroxy_Butyric_Acid	203	182	158	177	180	7832.25	3	8	11	2610.75	22.5	116.033	4.0662	significant					E7_a-Hydroxy_Butyric_Acid	141	107	99	102	112.25	3943.75	3
TRUE		E8_B-Methyl-D_Glucoside	214	190	187	212	200.75	183.833	5287.17	1751.44	10019.7	15306.8	3	8	11	5102.28	1252.46	4.07381	4.0662	significant			E8_B-Methyl-D_Glucoside	190	138	121	168	154.25	6337.44	3	8	11	2112.48	19.2812	109.561	4.0662	significant					E8_B-Methyl-D_Glucoside	226	186	179	195	196.5	1930.78	3
TRUE		E9_Adonitol	46	66	66	70	62	64.25	2175.5	372.25	2860.25	5035.75	3	8	11	1678.58	357.531	4.69493	4.0662	significant			E9_Adonitol	54	50	46	46	49	974.25	3	8	11	324.75	6.125	53.0204	4.0662	significant					E9_Adonitol	92	86	69	80	81.75	1513.75	3
FALSE		E10_Maltotriose	255	252	253	262	255.5	219.833	13145.2	5149.44	13747.7	26892.8	3	8	11	8964.28	1718.46	5.21647	4.0662	significant			E10_Maltotriose	194	167	165	177	175.75	8300.11	3	8	11	2766.7	21.9688	125.938	4.0662	significant					E10_Maltotriose	231	226	227	229	228.25	298.111	3
FALSE		E11_2-DeoxyAdenosine	282	281	285	283	282.75	282.167	57.1667	10.1111	185.667	242.833	3	8	11	80.9444	23.2083	3.48773	4.0662	Null			E11_2-DeoxyAdenosine	287	289	278	284	284.5	90.7778	3	8	11	30.2593	35.5625	0.850875	4.0662	Null					E11_2-DeoxyAdenosine	280	279	284	274	279.25	84.7778	3
FALSE		E12_Adenosine	295	292	274	285	286.5	281.417	221.167	364.361	734.917	956.083	3	8	11	318.694	91.8646	3.46918	4.0662	Null			E12_Adenosine	277	273	283	271	276	201.361	3	8	11	67.1204	34.5	1.94552	4.0662	Null					E12_Adenosine	290	284	272	281	281.75	169.194	3
FALSE		F1_Glycyl-L-Aspartic_Acid	250	244	252	245	247.75	256.25	465.5	333.75	610.25	1075.75	3	8	11	358.583	76.2812	4.70081	4.0662	significant			F1_Glycyl-L-Aspartic_Acid	263	261	255	255	258.5	71.25	3	8	11	23.75	32.3125	0.73501	4.0662	Null					F1_Glycyl-L-Aspartic_Acid	266	259	266	259	262.5	205.25	3
FALSE		F2_Citric_Acid	43	32	26	35	34	35.8333	38.1667	163.444	743.667	781.833	3	8	11	260.611	92.9583	2.80353	4.0662	Null			F2_Citric_Acid	52	35	33	33	38.25	278.111	3	8	11	92.7037	4.78125	19.389	4.0662	significant					F2_Citric_Acid	49	33	25	34	35.25	302.111	3
FALSE		F3_myo-Inositol	35	34	35	29	33.25	31.75	26	33.75	308.25	334.25	3	8	11	111.417	38.5312	2.89159	4.0662	Null			F3_myo-Inositol	35	27	29	28	29.75	54.75	3	8	11	18.25	3.71875	4.90756	4.0662	significant					F3_myo-Inositol	45	28	27	29	32.25	219.75	3
TRUE		F4_D-Threonine	66	42	43	44	48.75	93.3333	20837.2	8349.44	23988.7	44825.8	3	8	11	14941.9	2998.58	4.983	4.0662	significant			F4_D-Threonine	177	149	146	124	149	13813.1	3	8	11	4604.37	18.625	247.215	4.0662	significant					F4_D-Threonine	113	65	75	76	82.25	1826.11	3
FALSE		F5_Fumaric_Acid	277	279	281	276	278.25	277.167	8.16667	19.4444	279.667	287.833	3	8	11	95.9444	34.9583	2.74454	4.0662	Null			F5_Fumaric_Acid	265	282	281	280	277	194.111	3	8	11	64.7037	34.625	1.8687	4.0662	Null					F5_Fumaric_Acid	279	274	271	281	276.25	66.1111	3
FALSE		F6_Bromo_Succinic_Acid	250	261	259	260	257.5	258.417	305.167	80.3611	720.917	1026.08	3	8	11	342.028	90.1146	3.79548	4.0662	Null			F6_Bromo_Succinic_Acid	253	271	272	264	265	403.361	3	8	11	134.454	33.125	4.05898	4.0662	Null					F6_Bromo_Succinic_Acid	245	257	258	251	252.75	237.194	3
TRUE		F7_Propionic_Acid	232	228	238	224	230.5	228.5	2008.5	123	2375	4383.5	3	8	11	1461.17	296.875	4.92182	4.0662	significant			F7_Propionic_Acid	245	250	235	243	243.25	987	3	8	11	329	30.4062	10.8201	4.0662	significant					F7_Propionic_Acid	215	203	210	219	211.75	1265	3
TRUE		F8_Mucic_Acid	282	289	303	293	291.75	215.75	140916	23334.8	141362	282279	3	8	11	94092.9	17670.3	5.32492	4.0662	significant			F8_Mucic_Acid	290	296	292	294	293	23890.2	3	8	11	7963.42	36.625	217.431	4.0662	significant					F8_Mucic_Acid	63	67	51	69	62.5	94137.2	3
TRUE		F9_Glycolic_Acid	65	54	41	54	53.5	110.833	96163.2	13437.4	97299.7	193463	3	8	11	64487.6	12162.5	5.30219	4.0662	significant			F9_Glycolic_Acid	65	35	31	36	41.75	19824.8	3	8	11	6608.26	5.21875	1266.25	4.0662	significant					F9_Glycolic_Acid	246	233	237	233	237.25	64037.4	3
TRUE		F10_Glyoxylic_Acid	28	27	27	30	28	150.417	90818.2	59949.4	91140.9	181959	3	8	11	60653	11392.6	5.32389	4.0662	significant			F10_Glyoxylic_Acid	223	224	211	231	222.25	20846.9	3	8	11	6948.95	27.7812	250.131	4.0662	significant					F10_Glyoxylic_Acid	210	197	198	199	201	10344.7	3
FALSE		F11_D-Cellobiose	114	52	54	57	69.25	72.3333	288.167	2720.78	9820.67	10108.8	3	8	11	3369.61	1227.58	2.74491	4.0662	Null			F11_D-Cellobiose	113	51	56	54	68.5	2711.78	3	8	11	903.926	8.5625	105.568	4.0662	significant					F11_D-Cellobiose	135	65	55	62	79.25	4388.11	3
FALSE		F12_Inosine	284	281	280	283	282	284.583	46.1667	36.6944	90.9167	137.083	3	8	11	45.6944	11.3646	4.02078	4.0662	Null			F12_Inosine	289	287	285	286	286.75	27.5278	3	8	11	9.17593	35.8438	0.255998	4.0662	Null					F12_Inosine	285	282	289	284	285	26.6944	3
FALSE		G1_Glycyl-L-Glutamic_Acid	274	238	251	243	251.5	245.417	300.167	909.028	3666.92	3967.08	3	8	11	1322.36	458.365	2.88495	4.0662	Null			G1_Glycyl-L-Glutamic_Acid	275	228	223	231	239.25	1888.86	3	8	11	629.62	29.9062	21.0531	4.0662	significant					G1_Glycyl-L-Glutamic_Acid	268	230	249	235	245.5	869.028	3
FALSE		G2_Tricarballylic_Acid	94	46	46	51	59.25	57.75	98	1635.75	4646.25	4744.25	3	8	11	1581.42	580.781	2.72291	4.0662	Null			G2_Tricarballylic_Acid	96	49	53	43	60.25	1779.75	3	8	11	593.25	7.53125	78.7718	4.0662	significant					G2_Tricarballylic_Acid	83	45	40	47	53.75	1230.75	3
FALSE		G3_L-Serine	266	259	261	263	262.25	264.417	40.6667	45.5278	376.917	417.583	3	8	11	139.194	47.1146	2.95438	4.0662	Null			G3_L-Serine	262	267	262	266	264.25	20.8611	3	8	11	6.9537	33.0312	0.210519	4.0662	Null					G3_L-Serine	281	262	265	259	266.75	310.528	3
TRUE		G4_L-Threonine	249	77	64	71	115.25	153.25	42724.5	29712.8	69948.2	112673	3	8	11	37557.6	8743.53	4.29547	4.0662	significant			G4_L-Threonine	247	230	246	227	237.5	28721.2	3	8	11	9573.75	29.6875	322.484	4.0662	significant					G4_L-Threonine	152	97	79	100	107	11514.2	3
FALSE		G5_L-Alanine	251	231	234	233	237.25	228	891.5	599	1762	2653.5	3	8	11	884.5	220.25	4.01589	4.0662	Null			G5_L-Alanine	225	218	216	207	216.5	694	3	8	11	231.333	27.0625	8.54811	4.0662	significant					G5_L-Alanine	248	226	220	227	230.25	469	3
FALSE		G6_L-Alanyl-Glycine	258	260	263	260	260.25	243.917	1913.17	1079.86	1978.92	3892.08	3	8	11	1297.36	247.365	5.24473	4.0662	significant			G6_L-Alanyl-Glycine	234	232	226	226	229.5	882.361	3	8	11	294.12	28.6875	10.2526	4.0662	significant					G6_L-Alanyl-Glycine	241	242	243	242	242	16.6944	3
FALSE		G7_Acetoacetic_Acid	116	61	59	73	77.25	73.75	98	2165.75	5218.25	5316.25	3	8	11	1772.08	652.281	2.71675	4.0662	Null			G7_Acetoacetic_Acid	104	56	53	68	70.25	1693.75	3	8	11	564.583	8.78125	64.2942	4.0662	significant					G7_Acetoacetic_Acid	104	61	57	73	73.75	1358.75	3
FALSE		G8_N-Acetyl-B-D_Mannosamine	229	179	174	183	191.25	184.917	1981.17	2101.19	8040.92	10022.1	3	8	11	3340.69	1005.11	3.3237	4.0662	Null			G8_N-Acetyl-B-D_Mannosamine	212	160	152	144	167	4112.03	3	8	11	1370.68	20.875	65.6611	4.0662	significant					G8_N-Acetyl-B-D_Mannosamine	226	182	182	196	196.5	1827.69	3
FALSE		G9_Mono_Methyl_Succinate	236	96	77	102	127.75	123.667	155.167	16031.4	38802.7	38957.8	3	8	11	12985.9	4850.33	2.67733	4.0662	Null			G9_Mono_Methyl_Succinate	221	87	113	76	124.25	13204.1	3	8	11	4401.37	15.5312	283.388	4.0662	significant					G9_Mono_Methyl_Succinate	203	91	85	97	119	9567.11	3
FALSE		G10_Methyl_Pyruvate	279	257	256	261	263.25	254.417	918.167	656.861	2816.92	3735.08	3	8	11	1245.03	352.115	3.53586	4.0662	Null			G10_Methyl_Pyruvate	269	244	227	230	242.5	1669.03	3	8	11	556.343	30.3125	18.3536	4.0662	significant					G10_Methyl_Pyruvate	275	248	257	250	257.5	491.028	3
FALSE		G11_D-Malic_Acid	95	41	37	41	53.5	46.5	354.5	2503	3369	3723.5	3	8	11	1241.17	421.125	2.94726	4.0662	Null			G11_D-Malic_Acid	66	36	44	37	45.75	587	3	8	11	195.667	5.71875	34.2149	4.0662	significant					G11_D-Malic_Acid	49	36	35	41	40.25	279	3
FALSE		G12_L-Malic_Acid	292	279	283	279	283.25	283.917	580.667	114.528	944.917	1525.58	3	8	11	508.528	118.115	4.30538	4.0662	significant			G12_L-Malic_Acid	298	291	289	293	292.75	356.861	3	8	11	118.954	36.5938	3.25066	4.0662	Null					G12_L-Malic_Acid	287	270	277	269	275.75	473.528	3
FALSE		H1_Glycyl-L-Proline	261	193	185	191	207.5	208.667	3620.67	3856.44	14078.7	17699.3	3	8	11	5899.78	1759.83	3.35246	4.0662	Null			H1_Glycyl-L-Proline	266	216	221	219	230.5	3599.78	3	8	11	1199.93	28.8125	41.646	4.0662	significant					H1_Glycyl-L-Proline	248	169	160	175	188	6622.44	3
FALSE		H2_p-Hydroxy_Phenyl_AceticAcid	59	35	21	36	37.75	39.25	74	751.75	3342.25	3416.25	3	8	11	1138.75	417.781	2.72571	4.0662	Null			H2_p-Hydroxy_Phenyl_AceticAcid	59	26	37	27	37.25	720.75	3	8	11	240.25	4.65625	51.5973	4.0662	significant					H2_p-Hydroxy_Phenyl_AceticAcid	79	33	24	35	42.75	1869.75	3
FALSE		H3_m-Hydroxy_Phenyl_AceticAcid	70	38	24	37	42.25	42.8333	8.16667	1150.11	3353.67	3361.83	3	8	11	1120.61	419.208	2.67316	4.0662	Null			H3_m-Hydroxy_Phenyl_AceticAcid	68	31	42	28	42.25	994.111	3	8	11	331.37	5.28125	62.7447	4.0662	significant					H3_m-Hydroxy_Phenyl_AceticAcid	73	37	27	39	44	1209.44	3
FALSE		H4_Tyramine	50	28	25	31	33.5	34.5833	22.1667	385.694	1226.92	1249.08	3	8	11	416.361	153.365	2.71485	4.0662	Null			H4_Tyramine	50	29	29	27	33.75	357.528	3	8	11	119.176	4.21875	28.2491	4.0662	significant					H4_Tyramine	55	30	28	33	36.5	483.694	3
FALSE		H5_D-Psicose	159	95	88	97	109.75	101.5	1948.5	3551	13501	15449.5	3	8	11	5149.83	1687.62	3.05153	4.0662	Null			H5_D-Psicose	127	69	71	67	83.5	3827	3	8	11	1275.67	10.4375	122.22	4.0662	significant					H5_D-Psicose	176	97	80	92	111.25	6123	3
TRUE		H6_L-Lyxose	81	61	54	60	64	78.5	5046	1255	6427	11473	3	8	11	3824.33	803.375	4.76033	4.0662	significant			H6_L-Lyxose	127	98	102	103	107.5	3885	3	8	11	1295	13.4375	96.3721	4.0662	significant					H6_L-Lyxose	78	61	49	68	64	1287	3
FALSE		H7_Glucuronamide	69	34	34	37	43.5	44.4167	83.1667	876.361	3354.92	3438.08	3	8	11	1146.03	419.365	2.73277	4.0662	Null			H7_Glucuronamide	68	30	34	35	41.75	961.194	3	8	11	320.398	5.21875	61.3937	4.0662	significant					H7_Glucuronamide	81	36	40	35	48	1517.36	3
FALSE		H8_Pyruvic_Acid	281	276	283	282	280.5	282.917	188.167	52.3611	1354.92	1543.08	3	8	11	514.361	169.365	3.03701	4.0662	Null			H8_Pyruvic_Acid	304	274	266	275	279.75	872.861	3	8	11	290.954	34.9688	8.32039	4.0662	significant					H8_Pyruvic_Acid	298	275	294	287	288.5	429.694	3
FALSE		H9_L-Galactonic_Acid-g-Lactone	298	283	282	296	289.75	286.167	98.1667	264.111	665.667	763.833	3	8	11	254.611	83.2083	3.05992	4.0662	Null			H9_L-Galactonic_Acid-g-Lactone	295	286	280	283	286	126.111	3	8	11	42.037	35.75	1.17586	4.0662	Null					H9_L-Galactonic_Acid-g-Lactone	293	281	272	285	282.75	275.444	3
FALSE		H10_D-GalacturonicAcid	292	289	285	286	288	288.333	242.667	30.4444	418.667	661.333	3	8	11	220.444	52.3333	4.21231	4.0662	significant			H10_D-GalacturonicAcid	290	284	281	277	283	203.778	3	8	11	67.9259	35.375	1.92017	4.0662	Null					H10_D-GalacturonicAcid	300	292	290	294	294	184.444	3
FALSE		H11_Phenylethylamine	75	49	34	44	50.5	45.9167	217.167	1001.03	2648.92	2866.08	3	8	11	955.361	331.115	2.88529	4.0662	Null			H11_Phenylethylamine	64	28	41	28	40.25	993.194	3	8	11	331.065	5.03125	65.8017	4.0662	significant					H11_Phenylethylamine	69	38	40	41	47	654.694	3
FALSE		H12_2-Aminoethanol	66	48	45	53	53	53.5833	57.1667	259.361	956.917	1014.08	3	8	11	338.028	119.615	2.82597	4.0662	Null			H12_2-Aminoethanol	65	44	49	47	51.25	286.528	3	8	11	95.5093	6.40625	14.9088	4.0662	significant					H12_2-Aminoethanol	73	53	48	52	56.5	411.028	3
[truncated: 7 more columns]
