# Supplementary material for: Multidrug-resistant E. coli encoding high genetic diversity in carbohydrate metabolism genes displace commensal E. coli from the intestinal tract
Source: PLoS Biol. 2023 Oct 17;21(10):e3002329. doi: 10.1371/journal.pbio.3002329 (PMC10581457; doi:10.1371/journal.pbio.3002329)
Supplement: S12 Data — Data used to produce S10 Fig. (XLSX) [file pbio.3002329.s035.xlsx]

## Sheet: clpP
clpP Ct values
	PCR Effiency plate				Assay plates
DNA concentration	Replicate 1	Replicate 2	Replicate 4	Replicate 4	Plate1	Plate2	Plate3	Plate4	Plate5	Plate6	Plate7	Plate8	Plate9	Plate10	Plate13	Plate14
1	13.149	13.941	13.889	14.025	14.133	14.024	13.24	13.624	13.796	13.42	13.727	13.969	12.751	14.007	13.917	13.918
0.1	16.665	17.471	17.429	17.517	17.339	17.241	16.175	16.917	17.122	16.829	17.062	17.292	16.052	17.378	17.193	16.998
0.01	20.176	20.914	20.88	20.906	20.64	20.428	19.454	20.036	20.187	19.977	20.317	20.498	19.358	20.636	20.308	20.467
0.001	23.598	23.757	23.783	23.788	24.041	23.798	22.46	22.97	23.373	23.18	23.587	23.95	22.37	23.821	23.789	23.895
0.0001	27.135	27.081	26.98	27.185	27.043	26.971	25.642	26.107	26.452	26.341	26.848	27.194	25.669	27.021	27.058	27.121
1e-05	29.982	30.215	30.28	30.486	30.071	30.194	29.498	30.149	30.088	29.676	29.968	30.062	28.805	29.988	29.97	29.967
1e-06	33.378	32.974	33.426	33.421	33.332	33.484	31.837	32.539	33.005	32.759	32.933	33.603	31.53	32.947	33.322	33.677

## Sheet: lon
lon Ct values
	PCR Effiency plate				Assay plates
DNA Concentration	Replicate 1	Replicate 2	Replicate 3	Replicate 4	Plate1	Plate2	Plate3	Plate11	Plate12	Plate13	Plate14
1	13.803	13.996	13.902	13.514	12.773	13.121	13.375	13.3	13.977	13.945	13.969
0.1	18.039	17.562	17.236	16.52	15.991	16.433	16.755	16.844	17.349	17.386	17.491
0.01	20.531	20.465	20.475	20.486	20.382	20.311	20.311	20.258	20.442	20.342	20.378
0.001	24.554	24.305	24.299	24.115	22.929	23.224	23.578	23.706	24.247	24.225	24.287
0.0001	27.964	27.701	27.544	27.136	26.282	26.748	26.905	27.262	27.415	27.367	27.52
1e-05	31.036	31.102	30.676	30.633	29.6	30.443	29.985	30.182	30.844	30.777	30.934
1e-06	34.491	34.088	33.961	33.735	32.48	32.815	32.58	33.084	33.906	33.596	34.554

## Sheet: prtR
prtR Ct values
	PCR Effiency plate				Assay plates
DNA Concentration	Replicate 1	Replicate 2	Replicate 3	Replicate 4	Plate4	Plate5	Plate6	Plate7	Plate8	Plate9	Plate10	Plate11	Plate12	Plate13	Plate14
1	13.396	13.617	12.996	13.648	13.451	13.743	14.153	13.939	13.967	14.335	14.266	14.279	14.185	14.436	13.558
0.1	16.984	17.005	16.104	17.003	16.808	17.5	17.613	17.449	17.56	17.652	17.568	17.687	17.518	17.764	16.869
0.01	20.209	20.167	19.409	20.143	19.848	20.742	20.778	20.727	20.777	20.87	20.768	20.906	20.98	20.97	20.113
0.001	23.168	23.605	22.72	23.418	22.703	23.387	23.83	23.845	23.906	24.252	24.231	24.373	24.53	24.382	23.508
0.0001	27.437	26.991	26.257	26.991	25.836	26.537	26.883	27.024	27.253	27.52	27.386	27.427	27.59	27.569	26.726
1e-05	30.223	30.109	30.095	30.139	30.577	30.647	30.379	30.458	30.5	30.683	30.339	30.543	30.641	30.593	29.645
1e-06	33.178	33.445	33.194	33.124	32.639	33.068	33.463	33.488	33.974	33.985	33.753		34.182	34.01	32.982
